# Supplementary material for: Estimating spatial variation in the effects of climate change on the net primary production of Japanese cedar plantations based on modeled carbon dynamics
Source: PubMed Central journal article supplement (PMC7888599; doi:10.1371/journal.pone.0247165), 2021-02-17
Supplement: pone.0247165.s001.pdf [file pone.0247165.s001.pdf]

## **Title**

Estimating spatial variation in the effects of climate change on the net primary production of Japanese cedar plantations based on modeled carbon dynamics

## **Authors**

Jumpei Toriyama<sup>1,\*</sup>, Shoji Hashimoto<sup>2,3</sup>, Yoko Osone<sup>2</sup>, Naoyuki Yamashita<sup>2</sup>, Tatsuya Tsurita<sup>2</sup>, Takanori Shimizu<sup>4</sup>, Taku M. Saitoh<sup>5</sup>, Shinji Sawano<sup>6</sup>, Aleksi Lehtonen<sup>7</sup>, Shigehiro Ishizuka<sup>2</sup>

## **Affiliation**

<sup>1</sup> Kyushu Research Center, Forestry and Forest Products Research Institute (FFPRI), Kumamoto-city, Kumamoto, Japan

<sup>2</sup> Department of Forest Soils, FFPRI, Tsukuba, Ibaraki, Japan

<sup>3</sup> Graduate School of Agricultural and Life Sciences, The University of Tokyo, Bunkyo-ku, Tokyo, Japan

<sup>4</sup> Department of Disaster Prevention, Meteorology and Hydrology, FFPRI, Tsukuba, Ibaraki, Japan

<sup>5</sup> River Basin Research Center, Gifu University, Gifu-city, Gifu, Japan

<sup>6</sup> Hokkaido Research Center, FFPRI, Sapporo, Hokkaido, Japan

<sup>7</sup> Natural Resources Institute Finland, Helsinki, Finland

\* Corresponding author (JT)

E-mail: [jtori@affrc.go.jp](mailto:jtori@affrc.go.jp)

## **DOI**

10.1371/journal.pone.0247165

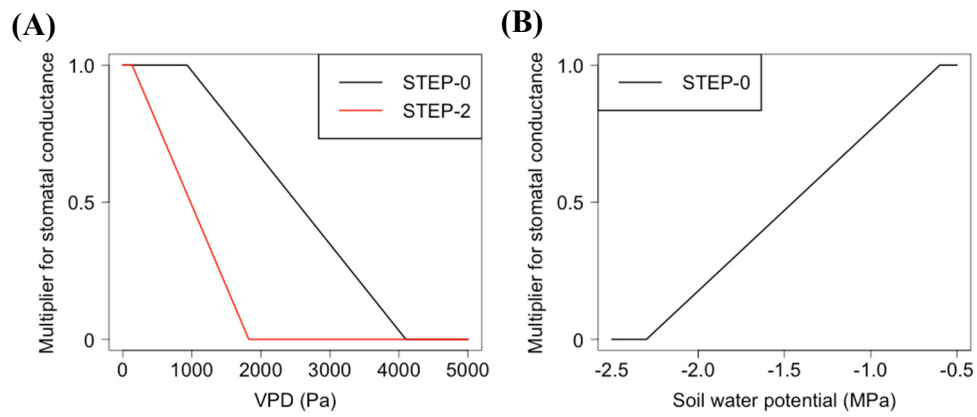

**S1 Fig. Multipliers of stomatal conductance**

(A) Vapor pressure deficit (VPD) and (B) soil water potential.

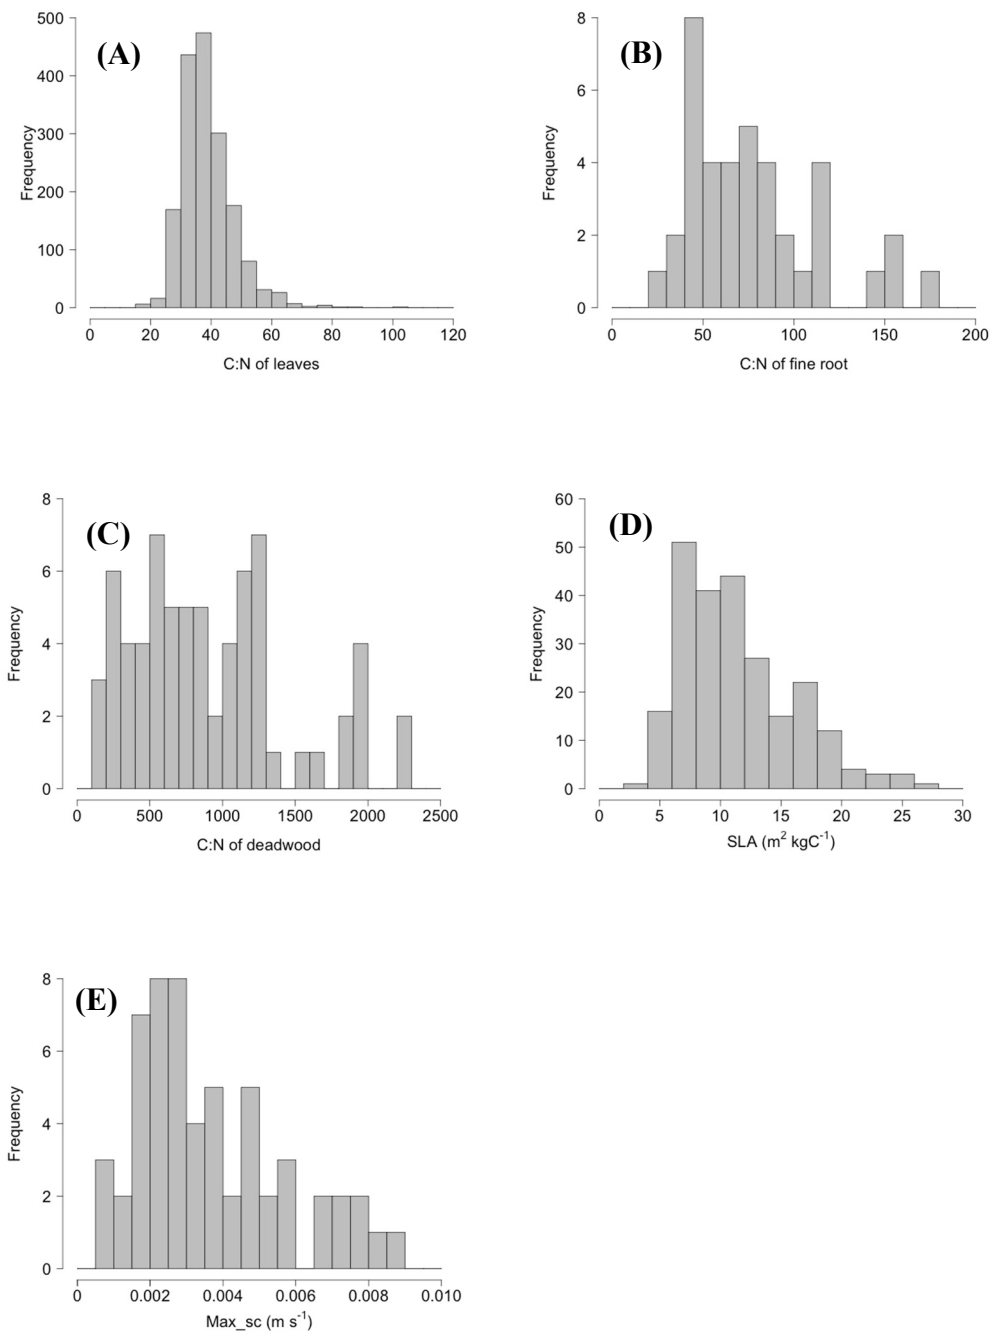

**S2 Fig. Histogram of observed data for five eco-physiological parameters in the plant trait database**

(A) C:N ratio of leaves, (B) C:N ratio of fine roots, (C) C:N ratio of deadwood, (D) specific leaf area (SLA), and (E) maximum stomatal conductance (Max\_sc).

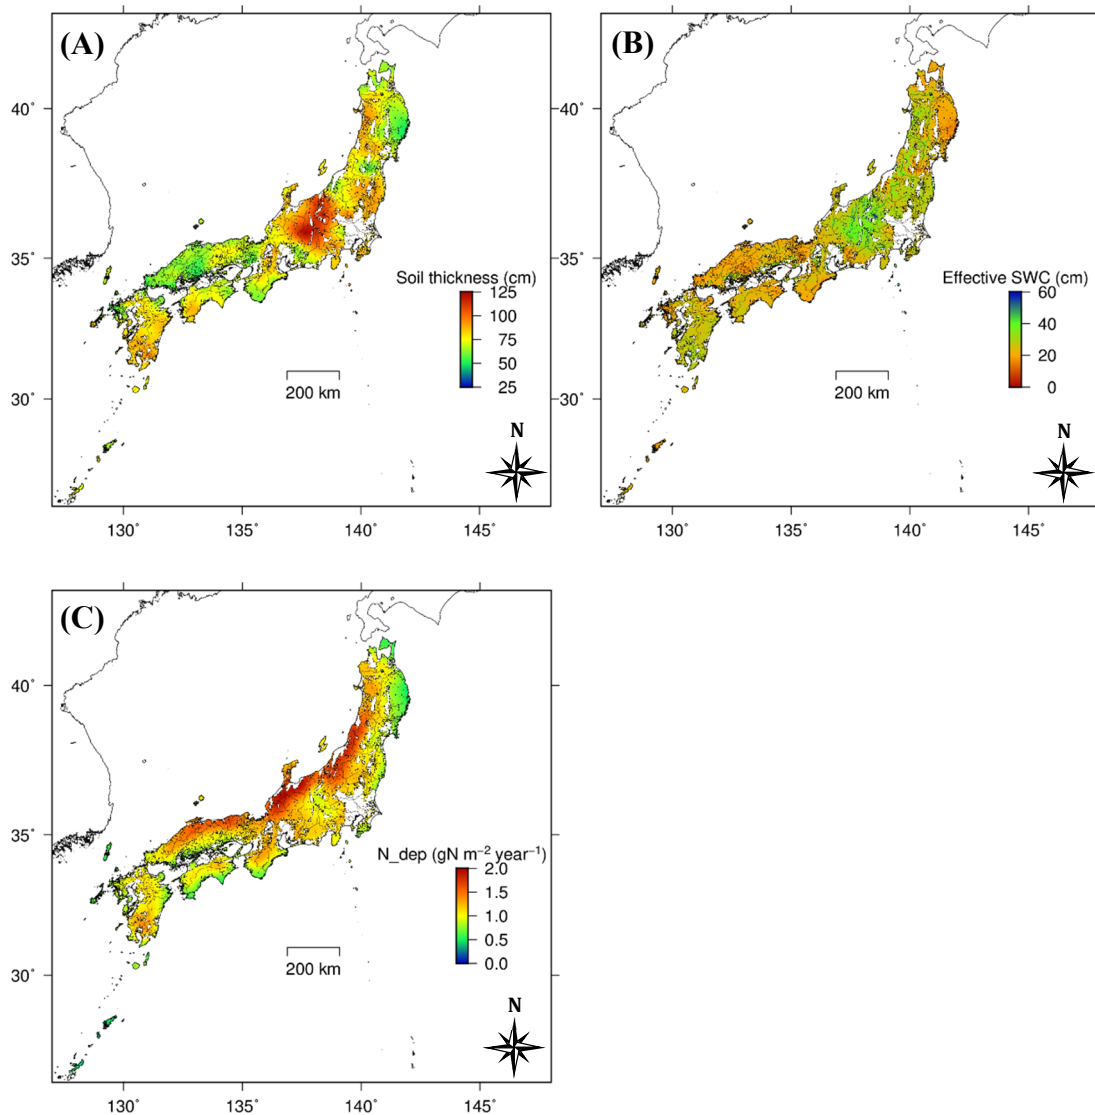

**S3 Fig. Map of spatial distribution of site parameters**

(A) Soil thickness, (B) the effective soil water-holding capacity of the soil profile, and (C) nitrogen deposition rate. The effective soil water-holding capacity of the soil profile is the product of soil thickness and the difference between the van Genuchten (vG) parameters  $\theta_s$  and  $\theta_r$ .

The data is deposited to a public repository (doi: 10.5281/zenodo.4505671).

**S4 Table. The vG parameters applied in this study**

| No | Soil code | A horizon                                |            |                                   |      | B horizon                                |            |                                   |      |
|----|-----------|------------------------------------------|------------|-----------------------------------|------|------------------------------------------|------------|-----------------------------------|------|
|    |           | $\theta_s$<br>( $\theta^3 \theta^{-3}$ ) | $\theta_r$ | $\alpha$<br>( $\text{MPa}^{-1}$ ) | $n$  | $\theta_s$<br>( $\theta^3 \theta^{-3}$ ) | $\theta_r$ | $\alpha$<br>( $\text{MPa}^{-1}$ ) | $n$  |
| 1  | PZ_dry    | 0.56                                     | 0.10       | 3173                              | 1.20 | 0.55                                     | 0.23       | 2239                              | 1.27 |
| 2  | PZ_wet    | 0.56                                     | 0.10       | 3173                              | 1.20 | 0.55                                     | 0.23       | 2239                              | 1.27 |
| 3  | BFS_dry   | 0.55                                     | 0.27       | 1126                              | 1.41 | 0.56                                     | 0.29       | 878                               | 1.44 |
| 4  | BFS_moist | 0.67                                     | 0.29       | 1587                              | 1.32 | 0.66                                     | 0.37       | 983                               | 1.43 |
| 5  | BFS_wet   | 0.58                                     | 0.33       | 1209                              | 1.49 | 0.58                                     | 0.33       | 1252                              | 1.41 |
| 6  | dBFS      | 0.67                                     | 0.29       | 1587                              | 1.32 | 0.66                                     | 0.37       | 983                               | 1.43 |
| 7  | ryBFS     | 0.67                                     | 0.29       | 1587                              | 1.32 | 0.66                                     | 0.37       | 983                               | 1.43 |
| 8  | RY        | 0.64                                     | 0.19       | 7134                              | 1.20 | 0.47                                     | 0.25       | 2756                              | 1.21 |
| 9  | BL        | 0.71                                     | 0.38       | 659                               | 1.48 | 0.70                                     | 0.40       | 568                               | 1.52 |
| 10 | IBL       | 0.71                                     | 0.38       | 659                               | 1.48 | 0.70                                     | 0.40       | 568                               | 1.52 |
| 11 | DR        | 0.64                                     | 0.19       | 7134                              | 1.20 | 0.47                                     | 0.25       | 2756                              | 1.21 |
| 12 | PT        | 0.79                                     | 0.00       | 398                               | 1.25 | 0.79                                     | 0.00       | 398                               | 1.25 |
| 13 | IM        | 0.50                                     | 0.00       | 7382                              | 1.12 | 0.50                                     | 0.00       | 2424                              | 1.12 |

**S5 Table. Changes in VPD and solar radiation**

| GCM    | Block | VPD in H_2000 | $\Delta$ VPD in F_2100 |          | Srad in H_2000 | $\Delta$ Srad in F_2100 |          |
|--------|-------|---------------|------------------------|----------|----------------|-------------------------|----------|
|        |       |               | RCP2.6                 | RCP8.5   |                | RCP2.6                  | RCP8.5   |
|        |       |               | (Pa)                   |          |                | (W m <sup>-2</sup> )    |          |
| 5GCMs  | SW    | 673 ± 86      | 68 ± 29                | 203 ± 67 | 312 ± 16       | -7 ± 4                  | -14 ± 5  |
|        | CT    | 606 ± 109     | 70 ± 30                | 205 ± 66 | 321 ± 28       | -9 ± 7                  | -21 ± 11 |
|        | NE    | 524 ± 87      | 62 ± 27                | 191 ± 59 | 307 ± 22       | -11 ± 6                 | -25 ± 10 |
|        | Total | 602 ± 112     | 67 ± 29                | 200 ± 65 | 314 ± 23       | -9 ± 6                  | -20 ± 10 |
| MIROC5 | SW    | 666 ± 84      | 89 ± 16                | 163 ± 25 | 317 ± 16       | -10 ± 3                 | -17 ± 4  |
|        | CT    | 597 ± 105     | 95 ± 15                | 192 ± 30 | 326 ± 28       | -10 ± 7                 | -22 ± 11 |
|        | NE    | 521 ± 84      | 71 ± 22                | 175 ± 25 | 313 ± 22       | -14 ± 6                 | -27 ± 10 |
|        | Total | 595 ± 109     | 85 ± 21                | 177 ± 29 | 319 ± 23       | -11 ± 6                 | -22 ± 10 |

Mean ± s.d.; VPD and solar radiation (Srad) were estimated on a daytime basis. SW, CT, and NE indicate the southwestern, central, and northeastern blocks, respectively.

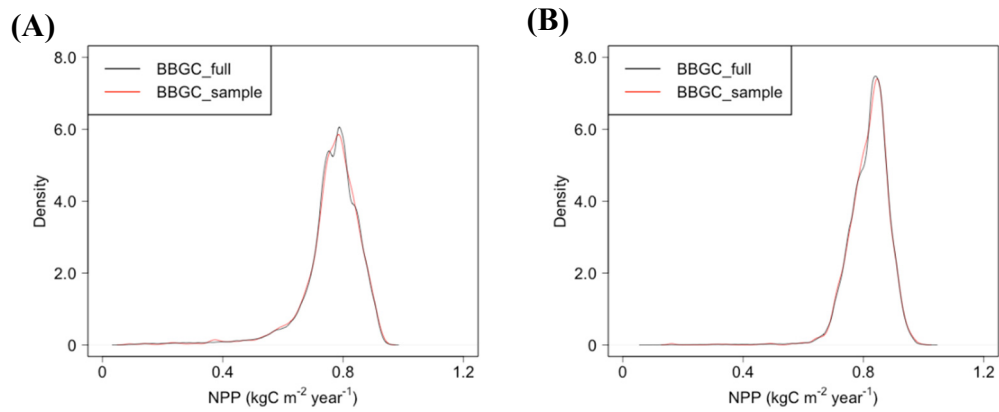

**S6 Fig. Distribution of calculated net primary production (NPP) in the BBGC\_full and BBGC\_sample datasets**

(A) Calculated NPP in the 1996–2000 period (H\_2000) and (B) predicted NPP for 2096–2100 (F\_2100) under RCP2.6 according to MIROC5.

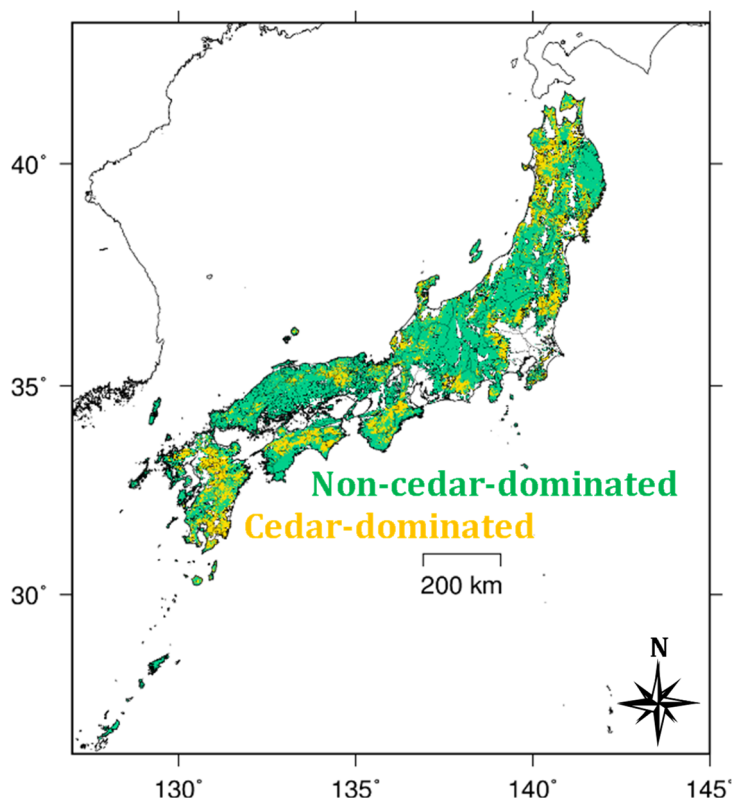

**S7 Fig. Map of cedar-dominated and non-cedar-dominated areas**



## **S8 Text. Sensitivity of NPP to eco-physiological and site parameters**

### **Methodology**

In this study, the sensitivity of mean NPP of the total area to six eco-physiological parameters and four site parameters for H\_2000 and F\_2100 (RCP2.6 and RCP8.5 in MIROC5) and their interactions were analyzed. The upper and lower values for sensitivity analysis were selected based on the quantiles of the distributions in the PTDB of four eco-physiological parameters (CN\_leaves, CN\_fineroot, Max\_sc, and SLA), the quantiles of the posterior distribution from BO for VPD\_rsc\_start, and the quantiles of the normal distribution ( $0.69 \pm 0.29$ , mean  $\pm$  standard deviation) assuming 42% as the coefficient of variance with reference to the value for fine-root turnover in *Picea abies* reported by Brunner et al. (2013). The sensitivity of four site parameters—namely, soil thickness ( $\pm 25\%$ ), N deposition ( $\pm 25\%$ ), shortwave albedo ( $0.15 \pm 0.0375$ ), and the cutting ratio of existing forest ( $90 \pm 9\%$ )—and their interactions with eco-physiological parameters were analyzed.

Reference: Brunner I, Bakker MR, Björk RG, Hirano Y, Lukac M, Aranda X, et al. Fine-root turnover rates of European forests revisited: an analysis of data from sequential coring and ingrowth cores. *Plant Soil*. 2013;362(1-2): 357–372.

### **Result**

The sensitivity of NPP to eco-physiological parameters was generally higher than that to site parameters (S8 Table). Low CN\_leaves (increase in N content of leaves) values, high CN\_fineroot (decrease in N content of fine roots) values, and high turnover of fine roots (more rapid turnover) had positive effects on NPP for H\_2000, whereas a high SLA (increase in SLA) had a strong negative effect (S8 Table). The positive effects of CN\_leaves and turnover of fine roots on NPP for F\_2100 decreased under RCP8.5, whereas those related to decreases in Max\_sc (reduced Max\_sc) and SLA (reduction in SLA) became significant.

Among site parameters, a negative effect on NPP was only found for reduced soil thickness. The effects of other site parameters, such as the cutting ratio of existing forest, N deposition, and shortwave albedo, were quite small.

**S8 Table. Sensitivity of the mean value of modeled NPP to site and eco-physiological parameters**

| Climate            | Site parameters    | Control_ep   | CN_leaves (gC gN <sup>-1</sup> ) |     |     |     | Max_sc (m s <sup>-1</sup> ) |        | SLA (m <sup>2</sup> kgC <sup>-1</sup> ) |      | TO_fineroot (year <sup>-1</sup> ) |      | VPD_rsc_start (Pa) |     |
|--------------------|--------------------|--------------|----------------------------------|-----|-----|-----|-----------------------------|--------|-----------------------------------------|------|-----------------------------------|------|--------------------|-----|
|                    |                    |              | 33                               | 42  | 50  | 99  | 0.0021                      | 0.0049 | 7.6                                     | 14.0 | 0.49                              | 0.89 | 125                | 206 |
| H_2000             | Control_site       |              | +                                | --- | -   | +   | -                           | -      | ---                                     | -    | +                                 |      |                    |     |
|                    | Cutting ratio      | 99%          | +                                | --- | -   | +   | -                           | -      | ---                                     | -    | +                                 |      |                    |     |
|                    |                    | 81%          | ++                               | --- | -   | +   | -                           | -      | ---                                     | -    | +                                 |      |                    |     |
|                    | N deposition       | +25%         | +                                | --- | -   | +   | -                           | -      | ---                                     | -    | +                                 |      |                    |     |
|                    |                    | -25%         | +                                | --- | -   | +   | -                           | ---    | ---                                     | ---  | +                                 |      |                    |     |
|                    | Soil thickness     | +25%         | ++                               | --- | -   | +   | -                           | -      | ---                                     | -    | +                                 |      |                    |     |
|                    |                    | -25%         | -                                | +   | --- | --- | ---                         | ---    | ---                                     | ---  | ---                               |      | -                  |     |
|                    | Shortwave albedo   | 0.1875       | +                                | --- | --- | +   | ---                         | -      | ---                                     | ---  | +                                 |      |                    |     |
|                    |                    | 0.1125       | +                                | --- | -   | +   | -                           | -      | +                                       | ---  | -                                 | +    |                    |     |
|                    | F_2100<br>(RCP2.6) | Control_site |                                  | +   | -   | -   | +                           | ---    | ++                                      | ---  | -                                 |      |                    |     |
| Cutting ratio      |                    | 99%          | -                                | -   | -   | +   | ---                         | ++     | ---                                     | -    |                                   |      |                    |     |
|                    |                    | 81%          | +                                | -   | -   | +   | ---                         | ++     | ---                                     | -    |                                   |      |                    |     |
| N deposition       |                    | +25%         | +                                | -   | -   | +   | ---                         | ++     | ---                                     | -    | +                                 |      |                    |     |
|                    |                    | -25%         | -                                | -   | -   | +   | ---                         | ++     | ---                                     | -    | +                                 |      |                    |     |
| Soil thickness     |                    | +25%         | +                                | -   | -   | +   | -                           | ++     | ---                                     | -    | +                                 |      |                    |     |
|                    |                    | -25%         |                                  | --- | --- |     | ---                         | ++     | ---                                     | ---  |                                   |      | -                  |     |
| Shortwave albedo   |                    | 0.1875       |                                  | -   | -   | +   | ---                         | ++     | ---                                     | -    |                                   |      |                    |     |
|                    |                    | 0.1125       | +                                | -   | -   | +   | ---                         | ++     | ---                                     | -    | +                                 |      |                    |     |
| F_2100<br>(RCP8.5) |                    | Control_site |                                  |     |     | -   | +                           | ---    | +++                                     | ---  |                                   |      |                    |     |
|                    | Cutting ratio      | 99%          |                                  |     | -   | +   | ---                         | +++    | ---                                     |      |                                   |      |                    |     |
|                    |                    | 81%          |                                  |     | -   |     | +                           | ---    | +++                                     | ---  |                                   |      |                    |     |
|                    | N deposition       | +25%         |                                  |     | -   | +   | +                           | ---    | +++                                     | ---  |                                   |      |                    |     |
|                    |                    | -25%         |                                  |     | -   |     | +                           | ---    | +++                                     | ---  | -                                 |      |                    |     |
|                    | Soil thickness     | +25%         |                                  |     | -   | +   | ++                          | -      | +++                                     | ---  | +                                 |      |                    |     |
|                    |                    | -25%         | -                                |     | -   |     |                             | ---    | +++                                     | ---  |                                   |      | -                  |     |
|                    | Shortwave albedo   | 0.1875       |                                  |     | -   |     | +                           | ---    | +++                                     | ---  | -                                 |      | -                  |     |
|                    |                    | 0.1125       |                                  |     | -   | +   | +                           | ---    | +++                                     | ---  |                                   |      | -                  |     |

Control\_ep, calculation based on control of eco-physiological parameters (STEP-2); Control\_site, calculation based on control of site parameters; TO\_fineroot, turnover of fine roots. The values for eco-physiological parameters were determined using the 25<sup>th</sup> and 75<sup>th</sup> quantiles of their distributions. The symbols ---, --, and - indicate ratios of mean NPP (rNPP) to the combination of control\_ep and control\_site for rNPP < 0.90, 0.90 ≤ rNPP < 0.95, and 0.95 ≤ rNPP < 0.98, respectively, whereas +++, ++, and + represent rNPP ≥ 1.1, 1.05 ≤ rNPP < 1.1, and 1.02 ≤ rNPP < 1.05, respectively. The climate scenario is based on MIROC5.

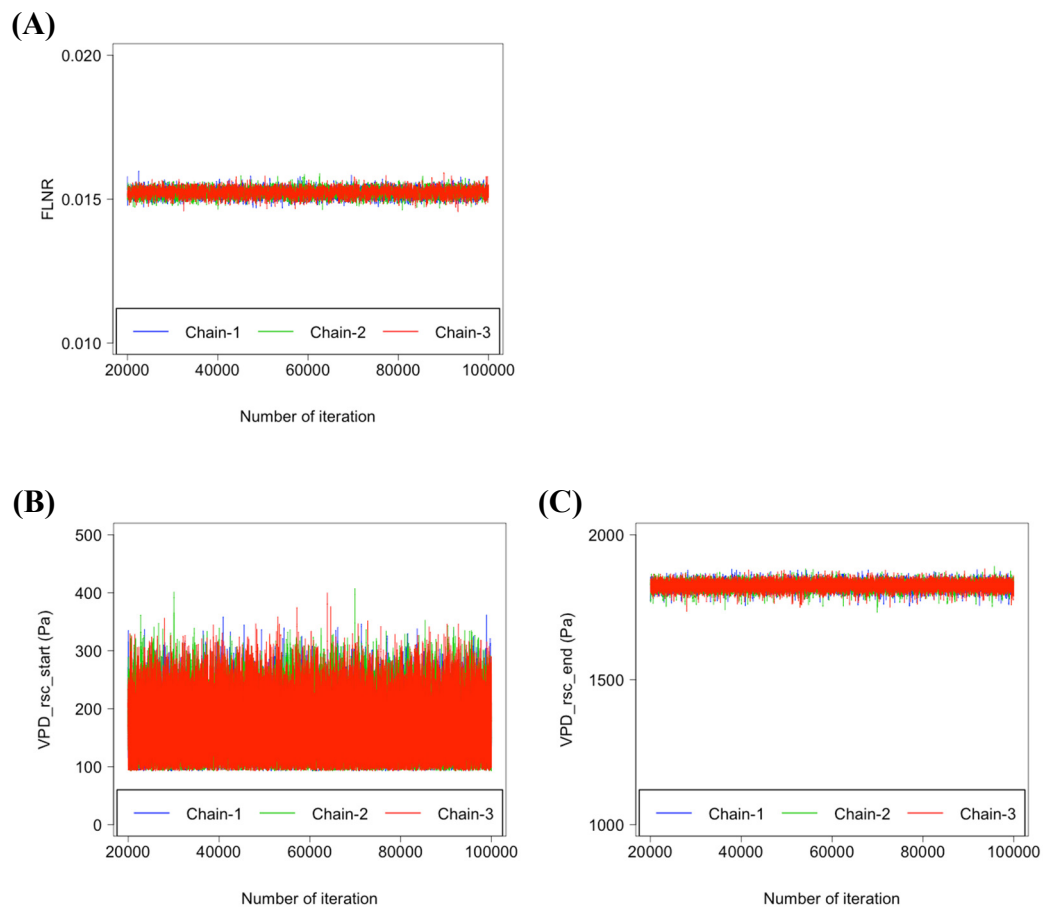

**S9 Fig. Markov chain Monte Carlo (MCMC) sampling of three eco-physiological parameters**

(A) Fraction of leaf nitrogen in Rubisco (FLNR), and VPD values for (B) starting and (C) ending the reduction of stomatal conductance (VPD\_rsc\_start and VPD\_rsc\_end, respectively). Three chains of MCMC sampling are starting from three different initial values.
